# Supplementary material
Source: publisher figshare collection journal article supplement (https://rs.figshare.com/ndownloader/files/13321355)

**Figure S3.** Partial dependence plots showing the fitted functions for the most important environmental factors driving spatial water salinity patterns (MN = in the draining catchment to the river reach, LC = in the hillslopes adjacent to the river reach). Codes according to Table S2: (a) MN_PRE, (b) MN_AGR, (c) LC_TEM, (d) MN_CON, (e) ELE, (f) MN_HAR.


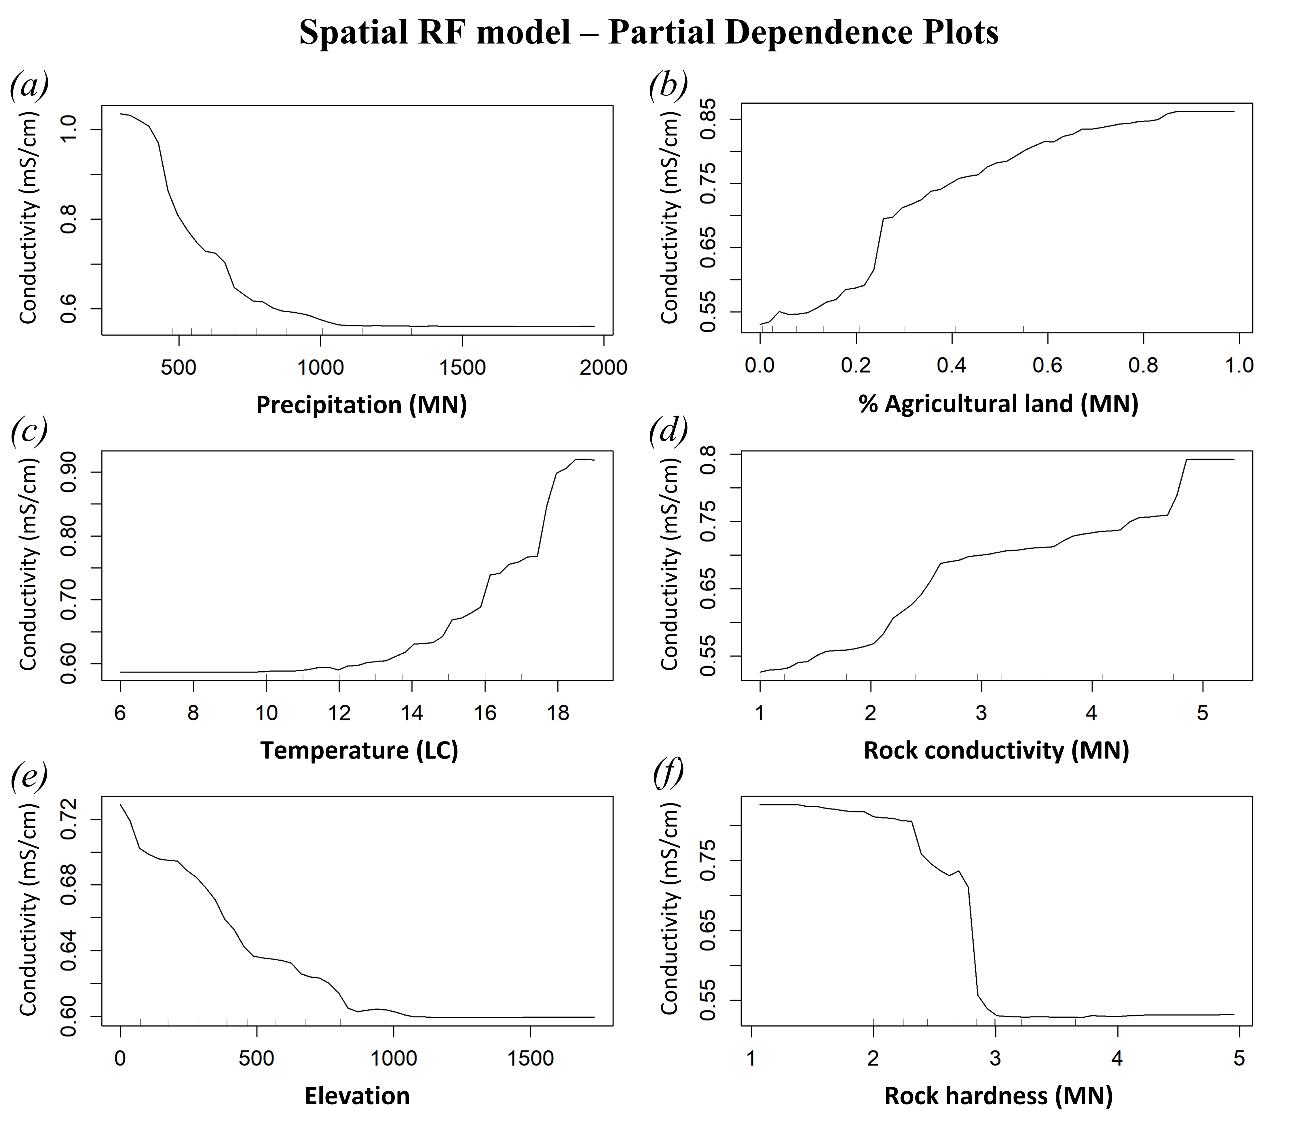

Supplement: Supplementary file 1 [file 13321355]
